# Supplementary material for: Variation of extreme drought and flood in North China revealed by document-based seasonal precipitation reconstruction for the past 300 years
Source: Copernicus journal article supplement (doi:10.5194/cp-14-1135-2018), 2018-08-09
Supplement: Supplementary file 1 [file cp-14-1135-2018-supplement.zip]

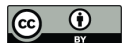

## *Supplement of*

# **Variation of extreme drought and flood in North China revealed by document-based seasonal precipitation reconstruction for the past 300 years**

**Jingyun Zheng et al.**

*Correspondence to:* Zhixin Hao ([haozx@igsnr.ac.cn](mailto:haozx@igsnr.ac.cn))

- [cp-14-1135-2018-supplement-title-page.pdf](#)
- [data file of cp-2018-45.xlsx](#)

The copyright of individual parts of the supplement might differ from the CC BY 4.0 License.
