# Supplementary material for: Variation of extreme drought and flood in North China revealed by document-based seasonal precipitation reconstruction for the past 300 years
Source: Copernicus journal article supplement (doi:10.5194/cp-14-1135-2018), 2018-08-09
Supplement: Supplementary file 1 [file data file of cp-2018-45.xlsx]

## Sheet: Percentage of sites
Percentage of sites with extreme and severe drought/flood that occurred over North China during 1736–2000.
Year	Extreme drought	Severe drought	Severe flood	Extreme flood
1736	0.0588235	0.176471	0.0588235	0
1737	0.0588235	0.176471	0.352941	0
1738	0.0588235	0.235294	0.176471	0.117647
1739	0.117647	0.117647	0.117647	0
1740	0	0	0.176471	0.0588235
1741	0.117647	0.352941	0	0
1742	0	0	0.470588	0.470588
1743	0.470588	0.823529	0.0588235	0.0588235
1744	0.0588235	0.0588235	0.176471	0.0588235
1745	0.235294	0.235294	0.117647	0.0588235
1746	0	0	0.411765	0.176471
1747	0.0588235	0.235294	0	0
1748	0.0588235	0.176471	0.0588235	0.0588235
1749	0.0588235	0.0588235	0.411765	0.176471
1750	0	0.0588235	0.235294	0.0588235
1751	0	0.0588235	0.470588	0.352941
1752	0.0588235	0.0588235	0.0588235	0
1753	0.117647	0.235294	0.0588235	0
1754	0	0.117647	0.294118	0.235294
1755	0.0588235	0.0588235	0.294118	0.117647
1756	0.117647	0.117647	0.0588235	0.0588235
1757	0	0.117647	0.176471	0.176471
1758	0.176471	0.352941	0.176471	0
1759	0.176471	0.176471	0	0
1760	0.117647	0.235294	0.0588235	0
1761	0.0588235	0.117647	0.176471	0.176471
1762	0	0.117647	0.294118	0.0588235
1763	0.117647	0.176471	0.0588235	0
1764	0.235294	0.294118	0.235294	0.176471
1765	0.235294	0.294118	0.294118	0.235294
1766	0.0588235	0.0588235	0.352941	0.117647
1767	0.176471	0.352941	0	0
1768	0	0.117647	0.0588235	0.0588235
1769	0.0588235	0.235294	0.117647	0
1770	0.117647	0.176471	0.176471	0.176471
1771	0.0588235	0.176471	0.176471	0.117647
1772	0.117647	0.117647	0.0588235	0
1773	0.117647	0.117647	0.0588235	0
1774	0	0.0588235	0.411765	0.235294
1775	0	0.0588235	0.0588235	0
1776	0	0	0.470588	0.176471
1777	0.294118	0.411765	0.117647	0.0588235
1778	0.470588	0.529412	0	0
1779	0.0588235	0.0588235	0.0588235	0
1780	0	0	0.352941	0.117647
1781	0	0	0.176471	0.117647
1782	0.0588235	0.176471	0.0588235	0
1783	0.470588	0.529412	0	0
1784	0.0588235	0.117647	0.0588235	0
1785	0.117647	0.176471	0.294118	0.117647
1786	0.176471	0.588235	0.117647	0.0588235
1787	0.0588235	0.0588235	0	0
1788	0.0588235	0.176471	0.117647	0.0588235
1789	0.0588235	0.0588235	0.176471	0.117647
1790	0.0588235	0.117647	0.0588235	0.0588235
1791	0	0	0.176471	0.0588235
1792	0.352941	0.529412	0.117647	0
1793	0.235294	0.352941	0.235294	0.235294
1794	0.176471	0.235294	0.411765	0.352941
1795	0.0588235	0.0588235	0.352941	0.117647
1796	0	0	0.294118	0.176471
1797	0	0.117647	0.588235	0.352941
1798	0	0.176471	0.352941	0.235294
1799	0	0	0.588235	0.470588
1800	0	0.0588235	0.529412	0.470588
1801	0.0588235	0.117647	0.294118	0.294118
1802	0.176471	0.176471	0.0588235	0
1803	0	0.0588235	0.235294	0
1804	0	0.0588235	0.0588235	0
1805	0.411765	0.529412	0.235294	0.117647
1806	0.0588235	0.235294	0.235294	0.117647
1807	0.176471	0.235294	0.294118	0.294118
1808	0	0.117647	0.235294	0.235294
1809	0.176471	0.235294	0.117647	0.0588235
1810	0.117647	0.235294	0.0588235	0
1811	0.0588235	0.294118	0.117647	0
1812	0.0588235	0.117647	0	0
1813	0.470588	0.529412	0.0588235	0
1814	0.0588235	0.352941	0	0
1815	0.117647	0.176471	0.235294	0
1816	0.0588235	0.0588235	0.235294	0.0588235
1817	0.117647	0.411765	0	0
1818	0.0588235	0.0588235	0.235294	0.117647
1819	0	0	0.352941	0
1820	0	0.0588235	0.294118	0.0588235
1821	0	0.117647	0.235294	0.0588235
1822	0	0	0.352941	0.352941
1823	0	0.176471	0.352941	0.294118
1824	0	0	0.352941	0.176471
1825	0.176471	0.352941	0.235294	0.176471
1826	0	0.176471	0.0588235	0
1827	0	0	0.352941	0.176471
1828	0	0	0.294118	0.0588235
1829	0	0.0588235	0.117647	0.0588235
1830	0	0	0.588235	0.117647
1831	0	0.0588235	0.0588235	0
1832	0.0588235	0.235294	0.176471	0.0588235
1833	0.117647	0.176471	0	0
1834	0.117647	0.294118	0	0
1835	0.117647	0.117647	0.0588235	0.0588235
1836	0.176471	0.235294	0.0588235	0.0588235
1837	0.235294	0.235294	0	0
1838	0.0588235	0.117647	0.0588235	0
1839	0	0	0.235294	0.117647
1840	0.0588235	0.0588235	0.117647	0.0588235
1841	0	0	0.0588235	0
1842	0.176471	0.176471	0.294118	0.176471
1843	0.0588235	0.0588235	0.235294	0.235294
1844	0	0.0588235	0.235294	0.117647
1845	0	0	0.117647	0
1846	0.176471	0.235294	0.0588235	0.0588235
1847	0.411765	0.411765	0	0
1848	0.0588235	0.0588235	0.0588235	0
1849	0.0588235	0.0588235	0.352941	0.176471
1850	0	0	0	0
1851	0.117647	0.294118	0.117647	0
1852	0	0	0.235294	0.117647
1853	0	0	0.117647	0
1854	0.117647	0.235294	0.0588235	0
1855	0.176471	0.294118	0.176471	0.0588235
1856	0.352941	0.529412	0	0
1857	0	0.235294	0.0588235	0
1858	0	0	0.411765	0.235294
1859	0	0.117647	0.235294	0.117647
1860	0.117647	0.117647	0.117647	0.0588235
1861	0.117647	0.235294	0.0588235	0
1862	0	0.0588235	0.0588235	0
1863	0	0	0.294118	0.0588235
1864	0.117647	0.117647	0.235294	0.0588235
1865	0.0588235	0.117647	0.352941	0.176471
1866	0.0588235	0.0588235	0.294118	0.117647
1867	0.176471	0.411765	0.352941	0.235294
1868	0.117647	0.235294	0.411765	0.0588235
1869	0.294118	0.529412	0	0
1870	0.0588235	0.0588235	0.117647	0.117647
1871	0	0	0.294118	0.294118
1872	0.0588235	0.117647	0.352941	0.294118
1873	0.0588235	0.117647	0.294118	0.0588235
1874	0.0588235	0.0588235	0.235294	0.0588235
1875	0.117647	0.235294	0.0588235	0
1876	0.352941	0.705882	0	0
1877	0.764706	0.882353	0.0588235	0
1878	0.235294	0.352941	0.235294	0.117647
1879	0	0.117647	0.235294	0.117647
1880	0.117647	0.352941	0.117647	0
1881	0	0.0588235	0.235294	0.117647
1882	0.0588235	0.176471	0.529412	0.235294
1883	0.117647	0.117647	0.705882	0.529412
1884	0.117647	0.176471	0.235294	0
1885	0.117647	0.176471	0.411765	0.176471
1886	0	0	0.529412	0.470588
1887	0	0.0588235	0.176471	0.0588235
1888	0.176471	0.176471	0.235294	0
1889	0	0	0.647059	0.411765
1890	0.0588235	0.117647	0.647059	0.588235
1891	0.117647	0.176471	0.0588235	0
1892	0	0.0588235	0.235294	0.117647
1893	0.0588235	0.176471	0.0588235	0
1894	0	0	0.235294	0
1895	0	0.117647	0.117647	0
1896	0.0588235	0.0588235	0.117647	0.0588235
1897	0	0	0	0
1898	0	0	0.294118	0.117647
1899	0.176471	0.352941	0.0588235	0.0588235
1900	0.235294	0.470588	0	0
1901	0.294118	0.529412	0	0
1902	0.411765	0.470588	0.176471	0
1903	0.0588235	0.235294	0.117647	0
1904	0.0588235	0.0588235	0.176471	0
1905	0	0.0588235	0.294118	0.117647
1906	0	0.117647	0.352941	0.117647
1907	0.117647	0.176471	0.352941	0.176471
1908	0.176471	0.235294	0	0
1909	0.117647	0.117647	0.117647	0.0588235
1910	0.0588235	0.0588235	0.470588	0.235294
1911	0	0	0.25	0.125
1912	0	0.125	0.125	0.125
1913	0	0.125	0.125	0.125
1914	0	0.125	0.75	0.25
1915	0.125	0.25	0	0
1916	0.375	0.625	0	0
1917	0	0	0.375	0.125
1918	0.125	0.125	0.125	0
1919	0.5	0.625	0	0
1920	0.5	0.75	0	0
1921	0.25	0.25	0.125	0.125
1922	0.375	0.5	0	0
1923	0	0.375	0	0
1924	0.125	0.125	0	0
1925	0	0	0	0
1926	0	0.25	0.125	0
1927	0.25	0.5	0	0
1928	0.125	0.125	0.125	0
1929	0.125	0.125	0.25	0.125
1930	0.222222	0.444444	0.111111	0.111111
1931	0.2	0.3	0.1	0
1932	0.2	0.3	0.2	0.2
1933	0.1	0.3	0.2	0.2
1934	0.2	0.2	0.2	0.1
1935	0.111111	0.222222	0	0
1936	0.8	0.9	0	0
1937	0	0	0.555556	0.333333
1938	0	0	0.125	0.125
1939	0.375	0.5	0.25	0.125
1940	0.25	0.25	0	0
1941	0.625	1	0	0
1942	0.125	0.5	0.125	0
1943	0.125	0.125	0	0
1944	0	0.25	0.125	0.125
1945	0.125	0.25	0	0
1946	0	0.125	0.125	0
1947	0	0.25	0.125	0
1948	0	0	0	0
1949	0	0	0.25	0.25
1950	0	0.111111	0	0
1951	0	0.133333	0.133333	0.0666667
1952	0.0666667	0.2	0.0666667	0
1953	0	0.0666667	0.266667	0.133333
1954	0.0625	0.0625	0.25	0.1875
1955	0.0625	0.1875	0.0625	0
1956	0	0	0.529412	0.352941
1957	0.117647	0.294118	0.294118	0.117647
1958	0	0.0588235	0.529412	0.470588
1959	0.235294	0.294118	0.0588235	0
1960	0.235294	0.352941	0.235294	0.117647
1961	0	0.0588235	0.352941	0.235294
1962	0.0588235	0.117647	0.176471	0
1963	0	0	0.647059	0.411765
1964	0	0	0.882353	0.823529
1965	0.411765	0.588235	0	0
1966	0.176471	0.235294	0.176471	0.0588235
1967	0.0588235	0.117647	0.235294	0.176471
1968	0.176471	0.294118	0	0
1969	0.0588235	0.235294	0.117647	0
1970	0.0588235	0.0588235	0.176471	0.117647
1971	0	0	0.294118	0.235294
1972	0.176471	0.294118	0	0
1973	0	0	0.352941	0
1974	0.0588235	0.117647	0.235294	0.117647
1975	0	0.117647	0.235294	0
1976	0.0588235	0.117647	0.176471	0
1977	0.117647	0.294118	0.117647	0.0588235
1978	0	0.176471	0.0588235	0
1979	0.117647	0.176471	0.117647	0.0588235
1980	0	0	0.117647	0
1981	0.352941	0.588235	0.117647	0.117647
1982	0	0	0.0588235	0
1983	0.235294	0.294118	0.294118	0.235294
1984	0	0.117647	0.352941	0.176471
1985	0	0	0.176471	0
1986	0.588235	0.764706	0	0
1987	0	0.117647	0.117647	0.0588235
1988	0.176471	0.294118	0.0588235	0.0588235
1989	0.117647	0.235294	0	0
1990	0	0	0.235294	0.117647
1991	0.294118	0.352941	0.0588235	0
1992	0.117647	0.176471	0	0
1993	0	0.0588235	0.235294	0.0588235
1994	0.0588235	0.0588235	0.235294	0
1995	0.117647	0.235294	0.0588235	0.0588235
1996	0	0.0588235	0.176471	0.0588235
1997	0.625	0.75	0	0
1998	0	0.0625	0.125	0.0625
1999	0.125	0.25	0	0
2000	0.142857	0.214286	0.214286	0.142857

## Sheet: precip anomaly % drought
Seasonal precipitation anomaly percentage among sites for each extreme drought event.
Spring
Site	1743	1777	1778	1783	1786	1792	1805	1813	1847	1856	1869	1876	1877	1900	1901	1902	1916	1919	1920	1922	1927	1936	1939	1941	1965	1981	1986	1991	1997
Yan'an	0.289027	-0.162132	-0.172874	-0.0654552	0.342737	-0.0654552	0.439414	0.396446	-0.172874	-0.119165	-0.441422	-0.237326	-0.634776	-0.355486	-0.0332295	-0.194358	NaN	NaN	NaN	NaN	NaN	NaN	NaN	NaN	-0.125683	-0.333333	-0.169399	0.79235	-0.202186
Xi'an	0.455845	-0.122504	0.0569836	-0.282049	0.376073	0.322891	-0.521366	0.0968697	0.209881	0.263062	0.0237451	0.0370405	-0.660968	-0.282049	-0.0759703	-0.328583	-0.348214	-0.133421	-0.348214	-0.192326	-0.348214	-0.245324	-0.433529	-0.554611	0.060132	-0.2441	-0.33771	0.158422	-0.300266
Yuncheng	0.00502906	-0.569273	-0.617132	-0.148118	0.531473	-0.387411	-0.148118	-0.224692	-0.138547	-0.377839	-0.483128	-0.320409	-0.282122	-0.578845	-0.358696	-0.530986	NaN	NaN	NaN	NaN	NaN	NaN	NaN	NaN	-0.216759	-0.486719	-0.291353	0.210383	-0.56753
Luoyang	-0.93464	-0.338229	-0.77124	-0.330059	0.723872	0.323542	1.27943	-0.77124	-0.0686187	0.364392	-0.640519	-0.338229	-0.133979	-0.264699	-0.330059	-0.0931287	NaN	NaN	NaN	NaN	NaN	-0.535126	NaN	NaN	-0.335849	-0.570562	-0.319332	0.260496	-0.0611475
Zhengzhou	-0.300846	-0.356487	-0.365062	-0.513241	0.321388	0.307419	0.0241518	-0.623055	-0.253748	0.351735	-0.109143	0.0178157	-0.571304	-0.314629	-0.43262	-0.040611	NaN	NaN	NaN	NaN	NaN	-0.330745	NaN	NaN	-0.422834	-0.739089	-0.138204	0.431056	0.146426
Taiyuan	0.0993089	-0.271886	-0.443207	-0.00571833	0.598995	-0.000628243	0.31346	0.0993089	-0.871509	0.0136485	-0.30044	-0.214779	-0.000628243	-0.557421	0.042202	-0.271886	-0.250471	-0.371823	-0.594541	0.290617	0.297756	-0.598824	-0.581692	-0.755868	0.343931	-0.306358	-0.263006	1.80347	-0.16185
Shijiazhuang	0.0391475	-0.0958067	-0.500669	-0.541156	0.403524	0.322551	0.59246	0.538478	0.970332	0.551974	-0.0823113	-0.770578	-0.365715	-0.392706	0.309056	-0.284743	-0.549124	-0.640396	-0.412028	-0.187131	0.225913	-0.757966	-0.629567	-0.348697	0.0142857	-0.742857	-0.342857	1.81429	0.257143
Cangzhou	0.146779	-0.311932	-0.369271	-0.670301	0.6915	-0.713305	0.3618	0.247123	0.648495	0.6915	0.0894404	-0.756309	-0.397941	-0.45528	0.677165	-0.254593	0.480203	-0.233567	0.0632336	-0.63461	-0.300166	-0.276096	-0.563668	-0.924172	-0.446255	-0.686264	0.112195	0.992225	-0.185854
Jinan	-0.635477	-0.356564	-0.149992	-0.495552	-0.12761	-0.38214	0.532686	-0.135278	0.0712933	0.112109	-0.320553	-0.415637	-0.264198	-0.773987	0.149866	0.0639164	-0.174958	-0.376365	-0.797379	0.472943	-0.454016	0.0531423	-0.652997	-0.452803	-0.471916	-0.567931	-0.603937	0.476236	0.81229
Linfen	0.0777784	-0.388889	-0.388889	-0.0222216	0.544445	-0.433333	0.155556	-0.0777772	-0.722222	-0.233333	-0.522222	-0.577778	-0.211111	-0.611111	-0.144444	-0.355555	NaN	NaN	NaN	NaN	NaN	NaN	NaN	NaN	-0.0926688	-0.528188	-0.237842	0.391241	-0.213646
Changzhi	0.137996	0.219282	-0.386849	-0.227788	0.737477	-0.491966	-0.116021	-0.0347353	-0.136342	-0.583412	-0.512287	-0.227788	-0.25827	-0.542769	-0.237949	-0.634215	NaN	NaN	NaN	NaN	NaN	NaN	NaN	NaN	0.182772	-0.698728	0.149297	0.305512	-0.051551
Anyang	-0.219479	-0.629753	-0.8499	-0.279519	0.340894	-0.66978	1.67178	-0.299533	-0.329553	0.751168	-0.48966	-0.889927	-0.449633	-0.48966	-0.289526	-0.209473	-0.188521	-0.256504	-1	0.0867249	-0.312713	-0.584723	0.0584506	-0.381865	-0.325626	-0.795279	-0.205202	0.685934	0.0958574
Linyi	-0.291108	0.0819926	-0.474658	-0.458417	-0.164254	-0.156792	0.417783	-0.00755159	0.268543	-0.171716	-0.343342	-0.201564	0.58941	-0.858222	0.00737244	0.395397	-0.230789	-0.57221	-0.483718	0.0703481	0.0630839	0.00695084	-0.145599	-0.404471	-0.21362	-0.69461	-0.511376	0.908688	0.572759
Shangqiu	-0.237219	-0.334246	-0.337612	0.0335359	0.348217	0.0956795	0.804065	-0.715115	-0.243439	-0.317601	-0.084179	-0.0453902	-0.0663301	-0.315199	-0.479022	-0.0459923	NaN	NaN	NaN	NaN	NaN	NaN	NaN	NaN	-0.549133	-0.800123	-0.432411	0.697426	0.0871153
Heze	-0.270829	0.0428841	-0.554474	-0.4364	0.0089692	-0.202999	0.466821	-0.338659	0.178544	-0.118212	-0.381053	-0.431925	-0.270829	-0.855862	0.0174479	0.398991	NaN	NaN	NaN	NaN	NaN	NaN	NaN	NaN	-0.489322	-0.805014	-0.257196	1.02414	0.281337
Tai'an	-0.200049	0.0407963	-0.303269	-0.320472	-0.04522	-0.41509	0.660113	0.212829	0.0407963	-0.354878	-0.389285	-0.819366	-0.294667	-0.879577	0.264438	0.169821	NaN	NaN	NaN	NaN	NaN	NaN	NaN	NaN	-0.592738	-0.378389	-0.356955	0.189634	0.768375
Weifang	-0.373277	0.152861	-0.3942	-0.380422	-0.381014	0.145124	0.694474	-0.24948	0.176073	-0.342328	-0.381014	-0.822042	0.0522759	-0.953576	0.0986999	0.555202	-0.37373	-0.605185	-0.60697	0.189735	-0.35707	-0.55818	-0.47369	-0.580549	-0.214481	-0.521858	-0.795082	0.388889	0.183971
Summer
Site	1743	1777	1778	1783	1786	1792	1805	1813	1847	1856	1869	1876	1877	1900	1901	1902	1916	1919	1920	1922	1927	1936	1939	1941	1965	1981	1986	1991	1997
Yan'an	-0.0669635	-0.743171	-0.144223	-0.451595	0.56373	-0.518852	-0.301035	-0.323792	0.00455849	-0.392063	-0.203505	-0.522103	-0.733418	-0.25227	-0.3498	-0.0897205	NaN	NaN	NaN	NaN	NaN	NaN	NaN	NaN	-0.302156	0.862019	0.0318825	-0.40799	-0.345151
Xi'an	0.203525	-0.273675	-0.0631454	0.103751	0.200016	0.136857	-0.175428	-0.133322	0.00352212	-0.277183	-0.312272	-0.221042	-0.582451	-0.592977	0.0105398	-0.340342	-0.311257	-0.0842849	-0.311257	-0.146531	-0.311257	-0.125813	-0.142164	-0.136725	0.00531713	0.514972	-0.279932	-0.0414646	-0.415508
Yuncheng	-0.322445	-0.315601	0.0853224	-0.0248814	-0.418261	-0.110281	-0.681754	0.368798	-0.589361	-0.565407	-0.271115	-0.637269	-0.832322	-0.212941	-0.0965933	0.0847724	NaN	NaN	NaN	NaN	NaN	NaN	NaN	NaN	-0.00187308	0.0229559	-0.639788	-0.53054	-0.666145
Luoyang	-0.294957	-0.232007	-0.244597	-0.418349	-0.669511	-0.124991	0.249563	-0.565643	-0.565643	-0.34217	0.000909325	-0.080926	-0.710429	-0.294957	-0.0714835	-0.446038	NaN	NaN	NaN	NaN	NaN	-0.672973	NaN	NaN	-0.570083	-0.113233	-0.513524	-0.370443	-0.653238
Zhengzhou	-0.360116	0.0175835	-0.312578	-0.496818	-0.260149	0.078566	-0.0285394	-0.680058	-0.668424	-0.264217	-0.155876	-0.370117	-0.467933	-0.552749	-0.109647	-0.415355	NaN	NaN	NaN	NaN	NaN	-0.498273	NaN	NaN	-0.516187	0.0243698	-0.629674	-0.420619	-0.722255
Taiyuan	-0.514719	0.399415	0.056715	0.00563115	-0.364244	-0.13477	-0.578671	0.181227	-0.548576	-0.183674	-0.0106285	-0.510957	-0.796859	0.060847	-0.379292	0.0984657	-0.444748	0.354649	-0.369135	-0.124989	-0.135146	-0.251388	0.851592	-0.563247	-0.439048	-0.0399819	-0.412695	-0.518109	-0.476696
Shijiazhuang	-0.512236	0.220771	-0.258371	-0.0252214	-0.0273126	-0.623474	0.201182	-0.0851995	-0.0532682	-0.0436055	-0.377654	-0.00165353	-0.395806	-0.286895	-0.170206	-0.350056	-0.290692	-0.216871	-0.404901	-0.385396	-0.176237	-0.333107	0.0507291	-0.340802	-0.517249	-0.0968757	-0.294858	-0.273161	-0.579627
Cangzhou	-0.368181	0.246951	-0.361118	0.00215305	-0.32448	-0.505382	0.560327	-0.230594	-0.230594	-0.54202	-0.226014	-0.230594	-0.743486	-0.244333	-0.198535	-0.39973	0.0625872	0.144716	-0.452428	-0.231921	-0.194279	-0.443097	-0.399814	-0.394681	-0.477024	0.115285	-0.44649	-0.324355	-0.72887
Jinan	-0.191112	0.523839	-0.124888	-0.374854	-0.0896551	-0.115575	-0.586097	-0.0999274	-0.0764704	-0.581394	0.131177	-0.31565	-0.32976	-0.180727	-0.00468651	-0.0303579	-0.34387	-0.411129	-0.18654	-0.0113372	-0.659706	-0.0491999	-0.42571	-0.420301	-0.304049	-0.35376	-0.394432	0.163684	-0.378615
Linfen	-0.566736	0.310624	-0.0107135	-0.00579967	-0.476472	-0.38982	-0.667831	0.436993	-0.638947	0.0253918	-0.397041	-0.404262	-0.79781	-0.061261	-0.303167	0.047055	NaN	NaN	NaN	NaN	NaN	NaN	NaN	NaN	-0.479205	0.0379489	-0.439143	-0.533833	-0.581179
Changzhi	-0.524151	0.0833796	-0.28006	0.060354	-0.557071	-0.182976	-0.646854	0.373677	-0.491231	0.158199	-0.0812223	-0.350571	-0.554079	-0.120128	0.00556783	0.415576	NaN	NaN	NaN	NaN	NaN	NaN	NaN	NaN	-0.596932	0.122432	-0.11549	-0.395398	-0.675306
Anyang	-0.252844	-0.363533	0.0100448	-0.393973	-0.308189	-0.0259294	-0.322025	-0.695603	-0.714974	-0.438249	-0.153223	-0.490827	-0.640258	-0.382904	-0.366301	-0.499128	0.0291777	-0.267233	-0.876027	-0.364087	-0.128331	-0.226555	0.342406	-0.216035	-0.653398	0.0555614	-0.642895	-0.42233	-0.67703
Linyi	-0.365288	-0.330256	-0.396347	-0.377686	-0.12418	-0.379714	-0.556938	-0.462144	-0.237522	-0.750649	-0.00465674	0.00564702	-0.167456	-0.0376288	-0.105634	0.125171	0.12311	-0.191769	-0.154778	0.0158218	-0.11912	-0.169517	-0.192185	-0.03197	0.174355	-0.253184	-0.0513413	-0.135748	-0.333921
Shangqiu	-0.295618	0.151106	-0.259538	-0.277818	-0.28036	-0.445827	0.173446	-0.209502	-0.204074	-0.252778	-0.150961	-0.490951	-0.763284	-0.550693	-0.206144	-0.408511	NaN	NaN	NaN	NaN	NaN	NaN	NaN	NaN	0.346098	-0.191136	-0.462504	-0.146607	-0.608927
Heze	-0.21492	-0.302693	-0.544567	-0.423868	-0.327074	-0.366085	-0.49043	-0.444105	0.0215791	-0.656223	-0.0052404	-0.370961	-0.21492	-0.105204	-0.158843	0.0167028	NaN	NaN	NaN	NaN	NaN	NaN	NaN	NaN	-0.0649324	-0.0414251	-0.569033	-0.535078	-0.514183
Tai'an	-0.45992	-0.19106	-0.431619	-0.393884	-0.266529	-0.365583	-0.733498	-0.311339	0.0707259	-0.766516	-0.0872888	-0.158042	-0.212285	0.132045	-0.165117	0.29006	NaN	NaN	NaN	NaN	NaN	NaN	NaN	NaN	-0.205276	-0.32625	-0.23369	-0.126062	-0.267055
Weifang	-0.454871	-0.333144	-0.0764161	-0.0554106	-0.245817	-0.296096	-0.679803	-0.518381	0.0161621	-0.703619	0.280788	-0.0843956	-0.105566	-0.0155929	-0.0764568	0.124659	-0.260089	-0.380824	-0.0896881	-0.345753	-0.169826	-0.262197	-0.354314	-0.360518	0.312698	-0.438145	-0.226172	-0.295127	-0.246603
Autumn
Site	1743	1777	1778	1783	1786	1792	1805	1813	1847	1856	1869	1876	1877	1900	1901	1902	1916	1919	1920	1922	1927	1936	1939	1941	1965	1981	1986	1991	1997
Yan'an	0.13399	-0.0210158	-0.0739699	-0.406575	0.517426	-0.00469937	0.0197752	0.468476	-0.339186	-0.559457	-0.722621	-0.0210158	-0.608406	-0.265762	-0.428926	-0.290236	NaN	NaN	NaN	NaN	NaN	NaN	NaN	NaN	-0.355729	0.135143	-0.593496	-0.256021	-0.32505
Xi'an	0.282427	0.641986	-0.0471688	0.252305	0.0427209	0.10864	0.120625	0.522133	-0.0471688	-0.38875	-0.61647	0.10864	-0.634448	-0.526581	-0.550551	-0.196985	-0.218559	0.0389612	-0.218559	-0.0316621	-0.218559	-0.626958	0.0430205	0.0600397	-0.278539	0.154327	-0.155383	-0.380632	-0.317286
Yuncheng	0.10397	-0.486525	0.535967	0.380005	-0.606336	-0.212672	-0.63201	-0.383831	-0.0586301	0.762929	-0.315367	0.335034	-0.614894	-0.144209	-0.649126	-0.204114	NaN	NaN	NaN	NaN	NaN	NaN	NaN	NaN	-0.383714	-0.0921091	-0.195386	-0.41814	-0.161635
Luoyang	-0.300566	-0.562854	-0.00184905	-0.341841	-0.351566	0.318725	-0.256851	-0.213136	-0.10385	0.231296	-0.29328	-0.34428	-0.766855	0.22401	-0.0309921	-0.220422	NaN	NaN	NaN	NaN	NaN	-0.718041	NaN	NaN	-0.0447658	-0.249311	-0.112259	-0.524793	-0.269972
Zhengzhou	0.120905	0.128799	-0.197229	-0.415866	-0.400079	0.0419683	-0.0685435	-0.344823	-0.218524	0.0972242	-0.297461	-0.0922246	-0.731614	0.15248	-0.202736	-0.392185	NaN	NaN	NaN	NaN	NaN	-0.691356	NaN	NaN	0.117435	-0.437812	-0.0630205	-0.555802	-0.187951
Taiyuan	-0.737447	-0.245161	0.124977	0.070593	-0.584292	-0.387377	-0.857784	-0.0920055	0.0502105	-0.0154276	-0.354558	0.269004	-0.704628	-0.573352	-0.737447	-0.737447	0.0742779	-0.262665	0.325891	-0.503338	-0.797616	-0.760421	-0.22	-0.550379	-0.660633	-0.619498	-0.588647	0.0695187	-0.557795
Shijiazhuang	-0.117045	-0.0869438	0.00335843	0.00335843	-0.347817	-0.668892	-0.0869438	-0.71906	0.153862	0.224097	-0.0167087	-0.257515	-0.648825	0.404702	0.304366	-0.21738	0.210823	-0.620068	-0.0875086	-0.46556	-0.292971	-0.570757	-0.0201168	-0.321247	-0.23563	-0.836934	-0.256013	-0.23563	-0.347737
Cangzhou	-0.10518	-0.0635609	-0.136395	-0.136395	-0.271658	-0.230039	-0.219634	-0.698259	0.269395	0.123727	0.144537	-0.386112	-0.583805	0.612756	0.363039	0.0404879	-0.108375	-0.492939	-0.275186	-0.54488	-0.65975	-0.852251	0.00249969	-0.0634256	-0.361271	-0.717462	-0.524274	-0.136689	0.0601214
Jinan	-0.393913	0.616232	-0.217115	-0.440737	-0.674997	-0.0952613	-0.622294	-0.385129	0.0364968	0.018929	0.141903	-0.0864774	-0.0513419	0.47569	0.0892	0.238526	0.642584	-0.742633	0.17616	-0.417629	0.0988622	-0.169924	-0.031139	-0.375467	-0.169811	-0.820755	-0.584906	0.113208	0.575472
Linfen	-0.0262346	-0.0899389	-0.00803342	0.0951794	-0.654177	0.0738721	-0.572271	-0.208247	0.00106719	-0.517668	-0.271951	0.228582	-0.635976	-0.772485	-0.799787	-0.717881	NaN	NaN	NaN	NaN	NaN	NaN	NaN	NaN	-0.525	-0.308333	-0.108333	-0.191667	-0.116667
Changzhi	0.346758	0.403663	-0.258948	0.0914488	-0.478368	-0.535274	-0.905158	-0.0326104	0.0432633	-0.00415776	-0.0515788	-0.317137	-0.829284	-0.203326	-0.8198	0.100169	NaN	NaN	NaN	NaN	NaN	NaN	NaN	NaN	-0.250259	-0.293347	-0.0865219	-0.439848	-0.164081
Anyang	-0.24408	-0.550047	-0.185406	-0.379065	-0.280076	-0.172087	-0.514051	-0.33407	0.0528891	0.565835	-0.190085	-0.127092	-1	0.205873	-0.352068	-0.262078	-0.0712697	-0.736328	0.23197	-0.946906	-0.213406	-0.739027	0.211387	-0.29255	-0.375473	-0.630961	-0.422786	-0.32816	-0.129447
Linyi	-0.483674	-0.592374	-0.448087	-0.431024	-0.164367	-0.327417	0.216085	-0.755424	0.107384	-0.0964288	-0.123604	0.0122715	1.16721	0.447073	0.0394465	0.40631	-0.174781	-0.310374	-0.282639	0.611921	-0.386535	-0.584201	0.402809	-0.541498	-0.530237	-0.483922	-0.239116	-0.411142	-0.61625
Shangqiu	0.168271	0.32791	-0.241918	-0.40498	-0.506569	-0.100214	-0.296135	-0.56462	0.0376568	0.146502	0.516575	0.0521695	-0.746028	0.219065	-0.883899	-0.201802	NaN	NaN	NaN	NaN	NaN	NaN	NaN	NaN	-0.606484	-0.434184	-0.132658	-0.293277	-0.188875
Heze	-0.493135	-0.580526	-0.438722	-0.289971	-0.309615	0.153554	-0.222225	-0.169791	0.0224683	0.00499024	-0.327093	-0.108617	-0.458179	0.345813	0.380769	0.503116	NaN	NaN	NaN	NaN	NaN	NaN	NaN	NaN	-0.544211	-0.650562	-0.255545	-0.567001	-0.088423
Tai'an	-0.264471	-0.67221	-0.224496	-0.240486	-0.224496	-0.0885833	-0.408379	-0.792133	0.135273	0.0313399	-0.00863447	-0.0246242	-0.584266	0.423089	0.0313399	0.255197	NaN	NaN	NaN	NaN	NaN	NaN	NaN	NaN	-0.137046	-0.722942	-0.608859	-0.698496	-0.377434
Weifang	-0.471088	-0.406977	-0.142401	-0.122896	-0.174577	-0.238687	-0.439033	-0.719516	-0.102452	-0.00628634	-0.0784107	0.0097413	-0.66342	0.506598	-0.463074	0.602764	-0.24386	-0.20599	-0.010959	1.4016	-0.170645	-0.532304	0.159456	-0.406206	-0.558554	-0.608529	-0.675162	-0.50025	-0.30035
Winter
Site	1743	1777	1778	1783	1786	1792	1805	1813	1847	1856	1869	1876	1877	1900	1901	1902	1916	1919	1920	1922	1927	1936	1939	1941	1965	1981	1986	1991	1997
Yan'an	-0.179048	-0.132137	-0.712942	-0.816045	1.50977	0.0320533	0.735726	0.196244	0.430801	-0.202504	-0.765442	-0.108681	-0.179048	-0.0617697	-0.108681	-0.460518	NaN	NaN	NaN	NaN	NaN	NaN	NaN	NaN	-0.745331	-0.405772	0.0186757	-0.235993	-0.235993
Xi'an	0.839903	-0.312564	-1	-0.404121	-0.312564	0.71859	0.88034	0.192904	0.233341	-0.110377	-0.514751	-0.0295019	-0.090158	0.172685	-0.130595	-0.595626	-0.628171	-0.505636	-0.628171	-0.837276	-0.628171	-0.518471	-0.453928	-0.735571	-0.188252	-0.203284	-0.383673	-0.218317	-0.477879
Yuncheng	0.386081	0.170468	-0.507171	-0.461325	-0.0143425	0.87891	0.632495	0.139666	-0.383964	0.0472611	-0.753586	-0.599577	-0.414766	-0.568775	0.232072	-0.353162	NaN	NaN	NaN	NaN	NaN	NaN	NaN	NaN	-0.157159	-0.578579	0.0632767	-0.455395	-0.559129
Luoyang	0.293841	0.0147775	0.0147775	-0.554234	-0.771675	1.91749	-0.264286	0.420689	0.36995	-0.289656	-0.746306	0.217733	0.0401469	0.268472	-0.340395	-0.365764	NaN	NaN	NaN	NaN	NaN	-0.336695	NaN	NaN	-0.620109	-0.509461	0.622835	-0.631174	NaN
Zhengzhou	-0.123229	0.391397	-0.569488	0.277036	-0.16135	0.63918	0.543879	0.372337	0.0673732	0.0864334	-0.752217	-0.18041	-0.237591	0.867903	-0.580675	-0.409133	NaN	NaN	NaN	NaN	NaN	-0.537392	NaN	NaN	-0.674479	-0.511719	0.269531	-0.511719	0.269531
Taiyuan	0.424113	0.329172	0.0127027	-0.513711	0.77223	0.77223	1.12035	-0.0822382	0.645642	-0.493649	-0.0505912	-0.0505912	0.424113	-0.493649	0.265878	-0.398708	-0.934704	-0.455864	1.3202	-0.743168	-0.756227	-0.799758	-0.947763	-0.616928	-0.00900901	0.891892	-0.0990991	-0.369369	0.441441
Shijiazhuang	-0.546435	-0.334771	-0.60691	-0.637148	-0.697623	0.17927	0.632835	0.0583192	-0.334771	-0.818574	-0.697623	-0.818574	-1	0.511885	-0.123107	-0.60691	-0.594568	-0.3823	-0.321138	-0.778055	-0.170032	-0.418278	-0.778055	-0.565432	-0.0494297	-0.176172	0.0773131	-0.112801	1.6616
Cangzhou	-0.0325544	-0.498362	-0.641687	-0.892506	-0.247542	0.648241	1.22154	0.612409	-0.211711	-0.785012	-0.641687	-0.785012	-1	1.86651	-0.0325544	-0.534193	-0.690156	-0.431953	-0.617859	-0.684992	-0.39064	-0.578733	-0.97418	-0.571383	-0.533961	-0.558066	0.245449	-0.0920272	2.63993
Jinan	-0.353257	0.450272	-0.646579	-0.74753	-0.88241	-0.274864	0.195494	0.293486	0.254289	-0.157274	-0.176873	0.0387083	-0.176873	1.41059	0.763844	0.58746	-0.972486	-0.3693	-0.390464	-0.316389	-0.329087	-0.136491	-0.659253	-0.866664	-0.848943	-0.194361	0.359517	2.87714	0.661631
Linfen	0.394532	0.249268	-0.128417	-0.510968	-0.0703119	0.772218	0.68506	0.0749519	-0.128417	-0.186523	-0.622314	0.307374	-0.0703119	-0.215576	0.249268	-0.215576	NaN	NaN	NaN	NaN	NaN	NaN	NaN	NaN	-0.773756	-0.622926	0.357466	-0.547511	-0.84917
Changzhi	0.205776	0.446931	-0.600458	-0.41154	0.125391	0.795266	0.554111	-0.00858419	0.286161	0.420136	-0.705255	-0.196149	-0.222944	-0.490895	0.286161	-0.437305	NaN	NaN	NaN	NaN	NaN	NaN	NaN	NaN	-0.605856	0.182432	0.351351	-0.54955	-0.155405
Anyang	-0.38897	0.454834	-0.408009	-0.679937	-0.679937	0.338447	-0.156196	0.454834	0.629414	-0.243487	-0.709033	0.251157	-0.359873	-0.359873	-0.243487	-0.185293	-0.325063	-0.791653	0.792499	0.602113	-0.428357	-0.288748	-0.119647	-0.485874	-0.89605	-0.168399	-0.012474	-0.532225	0.403326
Linyi	-0.598094	0.51193	-0.630606	-0.619186	0.205717	-0.0239437	-0.177051	0.224855	-0.349296	-0.177051	-0.119635	0.626761	0.224855	1.22005	0.741591	0.645899	-0.805718	-0.0301758	-0.384563	-0.466739	0.563893	-0.0952323	-0.131185	-0.285266	-0.164557	-0.417722	1.35443	-0.0379747	0.848101
Shangqiu	-0.175837	0.45666	-0.471001	0.0349954	-0.290836	0.341661	0.418327	-0.233337	0.629159	0.130828	0.0158288	0.111662	-0.137504	0.51416	-0.310003	-0.32917	NaN	NaN	NaN	NaN	NaN	NaN	NaN	NaN	-0.708575	-0.469907	0.627963	0.469689	0.524959
Heze	-0.73048	-0.387454	-0.727553	-0.655348	-0.0444277	-0.289446	-0.117933	0.494613	-0.0444277	0.0535797	-0.411956	1.03365	-0.0444277	0.568119	-0.240443	0.127085	NaN	NaN	NaN	NaN	NaN	NaN	NaN	NaN	-0.599125	-0.41691	0.457726	0.38484	-0.016035
Tai'an	-0.46117	-0.361387	-0.0221234	-0.0819934	-0.0420801	-0.261603	-0.301517	-0.0620367	-0.680693	-0.141863	-0.0420801	0.37701	-0.22169	1.35489	0.117573	-0.780477	NaN	NaN	NaN	NaN	NaN	NaN	NaN	NaN	-0.0837242	-0.43547	-0.261768	-0.0880667	0.771756
Weifang	-0.26202	0.982003	-0.375693	-0.361494	-0.17768	-0.0933391	-0.388531	0.349449	0.138597	-0.0933391	0.686811	0.180768	-0.451786	0.307279	0.47596	0.222938	-0.877859	-0.738515	-0.410177	1.20269	0.251305	0.0991482	-0.504674	-0.816996	-0.544863	-0.317295	0.430429	1.08062	0.918075

## Sheet: precip anomaly % flood
Seasonal precipitation anomaly percentage among sites for each extreme flood event.
Spring
Site	1742	1751	1774	1776	1794	1797	1798	1799	1800	1822	1823	1830	1858	1867	1872	1882	1883	1886	1889	1890	1910	1914	1937	1956	1958	1961	1963	1964
Yan'an	-0.0654552	0.472436	0.471639	-0.226584	0.0527056	0.106415	0.170866	-0.0332295	-0.108423	0.374962	0.41793	0.203092	0.256802	-0.656259	-0.140648	-0.00100386	0.181608	0.321253	-0.409196	0.127899	-0.012917	NaN	NaN	0.0601093	0.213115	-0.125683	0.748634	1.09836
Xi'an	0.369425	0.208767	-0.155743	0.263062	0.449198	0.362778	0.203233	0.0303928	-0.149095	0.216528	0.289653	0.322891	0.156699	-0.734092	0.296301	0.0370405	0.209881	0.342834	0.116813	0.236471	0.0370405	0.139145	-0.455244	-0.117727	0.149062	0.0414098	0.523501	0.717742
Yuncheng	0.531473	0.0241725	0.263465	0.167748	0.167748	0.56976	0.0911744	0.397469	0.397469	0.23475	0.148605	-0.0332578	-0.138547	-0.818138	0.072031	-0.00454264	0.502758	0.502758	-0.00454264	0.311324	0.0550362	NaN	NaN	0.273433	0.22992	0.36046	0.745864	1.2183
Luoyang	-0.0604487	0.11934	-0.191169	0.0947816	-0.0195986	0.200992	0.658512	-0.0195986	0.102952	0.0866115	-0.125809	-0.346399	0.0702715	-0.591499	-0.0522787	0.00491143	1.08335	0.135632	-0.215679	0.413412	0.00491143	NaN	-0.12826	0.197906	0.110975	-0.142862	0.932471	1.74354
Zhengzhou	-0.192477	0.0704848	-0.387296	0.248086	0.19356	0.181507	-0.0449625	0.386674	0.204676	0.0170396	0.3594	-0.51137	0.452011	-0.380238	0.129726	0.145059	0.535736	0.269311	-0.0503792	0.504943	0.137946	NaN	0.104519	0.0673624	0.106894	-0.288425	0.921252	1.56167
Taiyuan	0.0993089	-0.314717	0.113586	0.2278	0.427674	0.556165	0.2278	0.370567	0.97019	0.127862	0.0279252	0.0564787	-0.30044	-0.143396	-0.286163	0.113586	0.0136485	0.641825	0.0564787	-0.0577352	0.113586	0.359892	0.137856	0.286127	0.286127	-0.479769	1.64451	1.26879
Shijiazhuang	0.808387	0.0957612	-0.244256	-0.109302	-0.122798	-0.0958067	0.390028	0.700423	-0.257752	0.160606	-0.163284	-0.379211	-0.284743	0.0121566	0.889359	0.0391475	-0.892037	0.0256521	-0.365715	0.0796337	-0.183584	-0.590892	0.0541982	0.5	0.928571	0.0571429	1.87143	2.02857
Cangzhou	-0.0395723	0.101648	-0.397941	0.0751056	-0.139915	-0.383606	0.247123	0.404805	0.175449	0.275792	-0.354937	0.720169	-0.283263	0.0751056	1.7236	-1	-0.856653	2.22532	-0.827983	-0.15425	-0.18292	-0.0670692	0.262891	0.16553	0.527896	-0.703519	1.00791	1.97108
Jinan	-0.308954	0.261051	-0.0528028	0.561679	-0.422956	-0.453919	-0.700218	-0.284484	-0.249842	-0.45786	-0.522883	0.473574	-0.0615677	0.113273	0.796719	-0.0293619	1.36644	1.42696	0.333899	0.474399	0.34676	0.261051	0.71075	-0.171867	0.0801728	-0.651944	1.60442	1.22036
Linfen	0.500001	-0.211111	0.722223	-0.0666661	0.100001	0.611112	0.0666673	0.411112	0.277779	0.511112	0.155556	0.100001	-0.511111	-0.644444	0.18889	0.0111117	0.344445	0.311112	-0.388889	0.0888896	0.0111117	NaN	NaN	0.621098	0.185579	-0.262037	0.923542	1.28647
Changzhi	0.19896	-0.0347353	0.280246	-0.116021	0.513942	0.0770322	0.49362	0.463138	0.178639	0.137996	-0.116021	0.0770322	-0.0347353	-0.664698	0.0465502	-0.166824	-0.451323	0.625709	0.0567109	-0.044896	-0.268431	NaN	NaN	0.595626	0.0600312	-0.375139	0.651417	0.684892
Anyang	-0.149433	-0.75984	0.0507008	-0.0493659	-0.529686	0.120748	0.991328	0.120748	-0.0193459	-0.0693793	0.130754	-0.45964	0.200801	-0.719813	0.140761	0.0707142	1.35157	0.701135	0.0106741	0.581055	0.0707142	-0.312713	-0.178452	0.589595	1.58911	-0.530347	1.32418	1.36031
Linyi	0.149151	-0.30898	-0.0150136	0.268543	0.268543	-0.440349	-0.514969	-0.0672477	-0.0523237	-0.738829	-0.597051	0.425245	0.0148345	-8.95731e-05	1.10429	0.462556	0.126765	1.17145	0.171537	0.574486	0.343163	0.0393082	-0.0082381	-0.00748206	-0.183081	0.267369	0.2521	0.481142
Shangqiu	-0.00877225	-0.0744195	-0.383642	-0.152471	-0.19915	-0.0183889	0.133927	0.449206	0.0646756	-0.403301	0.56959	-0.485475	0.426942	-0.741656	-0.00298869	0.0335359	0.799051	0.304303	-0.0908021	0.88976	0.0335359	NaN	NaN	0.174085	-0.209648	0.0588885	1.41759	1.50532
Heze	-0.0588607	0.310939	-0.253872	0.161586	-0.516712	-0.39801	-0.779553	-0.152127	-0.228435	-0.381053	-0.53367	0.458342	-0.0503819	0.0683203	1.16208	0.466821	0.263331	1.1536	0.27181	0.661832	0.33964	NaN	NaN	0.132776	0.114206	0.0399257	1.06128	1.57196
Tai'an	-0.114033	0.0321946	-0.0538216	-0.208651	-0.174244	-0.535512	-0.380683	-0.0624232	-0.0538216	-0.260261	-0.578521	0.238634	0.152617	0.0149914	0.883755	0.410666	-0.372082	1.116	0.367658	0.625707	0.307447	NaN	NaN	-0.153323	-0.236919	-0.2187	0.922706	1.42642
Weifang	-0.0792586	0.0676883	0.191548	0.485566	0.0135893	-0.419701	-0.473862	-0.125683	-0.00188534	-0.040572	-0.582185	0.973017	0.114175	0.129649	0.76411	0.64805	-0.0947332	1.42952	0.338557	0.911119	0.578414	-0.44156	-0.149415	0.388889	-0.134791	-0.203097	1.07195	1.09472
Summer
Site	1742	1751	1774	1776	1794	1797	1798	1799	1800	1822	1823	1830	1858	1867	1872	1882	1883	1886	1889	1890	1910	1914	1937	1956	1958	1961	1963	1964
Yan'an	0.482455	0.472569	0.121594	0.202869	-0.301035	0.846567	0.196367	0.219124	0.716527	-0.203505	0.518216	0.193116	0.72628	-0.271776	-0.15474	0.0728295	-0.353051	-0.265274	1.16191	0.62875	-0.012828	NaN	NaN	0.425453	0.709882	0.402302	-0.411298	0.25678
Xi'an	0.0421191	0.277305	0.0842249	0.228087	0.178963	0.178963	0.0105398	0.0842249	-0.0456013	0.207034	0.36493	0.256157	0.161419	-0.0456013	0.112295	0.249139	0.0386103	0.0386103	0.287736	0.235104	0.182472	0.203735	0.35886	0.765118	0.59563	-0.0169165	-0.19226	-0.0882113
Yuncheng	0.00948855	0.204542	0.204542	-0.00419943	0.156634	0.587806	0.142946	0.622026	0.786281	0.409862	0.272982	0.0471305	0.0950384	-0.315601	-0.555141	-0.00762143	-0.281381	-0.00762143	0.420128	-0.192409	-0.123124	NaN	NaN	0.947742	0.948888	0.168492	-0.392262	-0.029376
Luoyang	-0.131286	0.113491	-0.074631	0.0260894	0.381758	0.287333	0.551724	0.413234	1.06792	-0.169056	0.158285	0.353431	0.287333	-0.147024	-0.0840735	-0.628593	0.230678	0.277891	0.293628	0.205498	-0.241449	NaN	1.16927	0.995058	0.561101	-0.104143	-0.233421	0.402196
Zhengzhou	0.131432	0.158972	0.33353	0.319045	0.471734	0.527806	0.824878	0.537852	0.497592	0.163426	-0.290929	0.326636	0.331192	-0.177737	-0.162007	-0.681982	0.29722	-0.202351	0.420206	0.305946	-0.231819	NaN	0.875152	0.803847	0.594792	-0.232469	0.296141	0.221479
Taiyuan	0.030752	0.296338	0.30913	-0.0482472	0.230131	-0.0331997	-0.0708184	0.215084	0.658984	0.410701	0.237655	-0.0783422	0.0420376	0.245179	-0.0896278	0.655222	-0.322864	-0.334149	-0.191198	-0.176151	0.030752	0.375415	0.566442	0.833446	-0.0813945	0.118139	-0.00609894	0.0804909
Shijiazhuang	0.0885756	0.109044	0.0955154	0.310408	0.503373	0.478506	-0.045437	0.527766	0.463203	0.546017	0.155003	0.140967	-0.0267324	0.0512839	0.083919	0.216203	0.608096	0.212039	0.062446	0.403579	0.0441652	-0.349457	-0.276284	0.806249	-0.0914515	-0.0616186	1.1995	0.152636
Cangzhou	-0.0107638	0.202839	-0.502994	0.353513	0.768636	0.816829	-0.118389	-0.0267931	0.365566	0.476985	-0.283555	0.0419039	-0.0723269	-0.580949	0.211356	0.296702	0.573412	0.302605	0.0769064	0.398147	-0.00295351	0.292504	0.11976	0.0333256	-0.0839882	0.127452	-0.188446	0.728944
Jinan	0.575755	0.298296	0.599009	1.05137	-0.272284	-0.0710897	-0.122122	0.135944	0.404381	0.176605	-0.00128122	0.177148	0.367888	0.230523	0.34263	-0.143974	0.220443	0.338057	0.173649	0.675553	0.403976	0.298296	0.19632	-0.224964	-0.24756	0.742137	0.602043	0.624638
Linfen	-0.0107135	0.921868	0.108434	0.28174	-0.0720926	0.205919	0.155371	0.570583	1.10133	0.75472	0.505593	0.144539	0.115655	-0.0107135	-0.306777	0.357561	0.440603	-0.490915	0.173424	-0.519799	-0.0107135	NaN	NaN	0.64615	1.13781	0.00881346	-0.380873	0.322019
Changzhi	0.00257507	0.0265172	0.0744013	0.119293	-0.0632657	0.39762	0.164184	0.370685	0.388641	0.206083	0.221047	-0.0243598	-0.147063	-0.171005	-0.0273525	-0.254802	-0.392469	-0.0961861	0.34375	-0.248817	-0.314658	NaN	NaN	0.668253	0.665454	0.0664502	0.060852	0.122432
Anyang	-0.0757399	0.729513	0.0930621	0.344882	0.624373	0.41683	0.73783	0.544123	0.635442	-0.0757399	0.0100448	0.463873	-0.0176277	-0.189197	-0.169826	-0.382904	0.535821	0.378088	0.510916	0.436201	0.38639	-0.128331	0.583141	0.985086	0.407415	0.0214263	1.33957	0.357525
Linyi	0.475498	-0.205973	0.281788	-0.305527	-0.354985	-0.0602971	-0.266372	0.108685	0.242634	0.0509836	0.0468621	0.184932	0.358036	0.189054	0.133414	0.0880771	0.366279	0.776368	0.545564	0.842312	0.226147	0.512592	0.42604	-0.0550112	0.0844435	-0.238504	0.638592	-0.244009
Shangqiu	0.326273	0.0346765	0.123467	0.337053	0.329935	0.346376	0.621906	0.299578	0.0139035	-0.0438711	-0.487132	0.507962	-0.116722	-0.16722	-0.165109	0.0171584	0.329935	-0.16902	0.395074	-0.265598	-0.271816	NaN	NaN	0.0988285	0.303664	-0.466695	0.296853	-0.00647042
Heze	0.472634	0.340089	-0.166157	-0.349018	-0.258807	-0.161281	0.353166	0.262955	0.572598	0.275145	-0.000364125	-0.0369362	0.774963	0.436062	0.397052	0.306841	0.350728	0.891994	0.123981	0.884679	0.548217	NaN	NaN	0.316408	0.162305	-0.0884396	0.431333	-0.174633
Tai'an	0.662691	0.275909	-0.143891	-0.301906	-0.283038	0.219307	-0.110873	0.294776	0.115536	-0.0637045	0.167421	0.186289	0.771179	0.440999	0.268834	0.308927	0.433924	0.952778	0.627315	1.0023	0.398547	NaN	NaN	0.0254777	0.539078	0.26721	0.378497	1.01544
Weifang	0.540121	0.627764	0.132597	0.0161621	-0.298742	-0.0155929	-0.116151	0.174937	0.518951	-0.0420555	-0.139967	0.066441	0.489842	0.492488	0.360175	0.376053	0.26491	0.439563	0.283434	0.810039	0.484549	0.317902	-0.115591	0.0445398	-0.530085	-0.254265	-0.159771	1.00225
Autumn
Site	1742	1751	1774	1776	1794	1797	1798	1799	1800	1822	1823	1830	1858	1867	1872	1882	1883	1886	1889	1890	1910	1914	1937	1956	1958	1961	1963	1964
Yan'an	0.142148	0.593456	0.0360916	0.158465	0.0605662	-0.298395	-0.257604	1.07218	0.22373	-0.135231	0.754013	0.468476	-0.216813	0.158465	0.00345883	0.713222	-0.689988	-0.412609	-0.347344	0.346103	0.0682112	NaN	NaN	-0.562816	-0.0796134	0.940482	0.817763	1.1399
Xi'an	-0.149044	0.449218	-0.131066	0.51614	-0.107095	0.0127577	0.000772355	0.444228	-0.472647	-0.238934	0.270442	0.282427	-0.238934	-0.304853	-0.47864	-0.0531615	-0.0891174	0.731876	-0.364779	0.288419	0.594045	0.365746	0.119367	-0.542482	0.145512	0.376039	0.279225	0.828226
Yuncheng	0.198107	-0.349599	-0.0158405	0.172433	-0.22123	0.497634	0.180991	-0.0243984	0.489076	1.0539	0.762929	0.0440649	-0.0158405	0.711582	0.189549	-0.0415142	0.292244	0.155318	-0.0158405	-0.383831	0.24097	NaN	NaN	-0.711095	0.354074	0.955509	-0.031358	0.385124
Luoyang	0.0782945	0.259956	-0.191279	0.347868	0.632013	-0.162136	0.318725	1.43345	0.996302	0.245867	-0.657569	0.355154	-0.0747068	-0.118421	0.245867	0.377011	0.27501	-0.00184905	0.508155	-0.220422	0.333297	NaN	-0.406209	-0.856749	0.0330579	0.959366	-0.398072	0.913912
Zhengzhou	0.199842	0.353447	0.223523	0.436653	0.539271	0.15248	0.0656494	0.0103935	0.0893305	0.223523	-0.289567	0.0735431	-0.0527561	-0.100118	0.191949	0.499803	0.562952	-0.0764372	0.412972	0.0735431	-0.0132876	NaN	-0.207473	-0.916713	0.124375	0.915602	-0.430872	0.714325
Taiyuan	0.334643	-0.573352	0.356522	-0.332679	0.42216	0.181487	0.00645176	0.323703	0.575316	0.925386	0.892567	-0.0482467	0.400281	0.367462	-0.792146	0.465919	0.805049	-0.157644	-0.343618	-0.518654	0.356522	0.464264	0.36418	-0.300699	-0.269848	0.624846	-0.310983	1.50926
Shijiazhuang	0.575273	0.141945	0.334467	0.3144	0.173929	0.304366	-0.21738	-0.879597	-0.849496	0.374601	0.00335843	0.555206	0.3445	0.324433	-0.18728	0.555206	0.785978	0.153862	-0.0969774	0.565239	-0.149174	0.389987	0.8047	-0.154097	0.0395434	0.763147	-0.673869	1.3033
Cangzhou	0.248585	0.0354694	0.716805	-0.427732	0.217371	0.196561	-0.16761	-0.875141	-0.59421	0.102917	-0.271658	0.74802	0.456683	-0.729473	-0.417327	0.768829	0.872878	0.352634	0.0612977	0.74802	2.16572	0.394056	0.512921	0.980181	-0.537555	0.632442	-0.49771	1.34965
Jinan	0.396635	0.16147	0.326365	0.212174	-0.481752	0.00136128	-0.200668	-0.560806	-0.227019	-0.156748	-0.666213	0.458123	0.238526	0.493258	1.06421	-0.0689097	0.598665	0.106768	0.51961	0.818261	0.554745	0.16147	0.66103	0.254717	-0.245283	0.95283	-0.849057	1
Linfen	0.210381	-0.435762	0.201281	0.110275	0.246784	0.173979	-0.0353353	0.101174	0.556204	0.983933	0.874726	0.00106719	0.219482	0.274086	-0.0808383	0.183079	1.13864	0.173979	-0.508567	-0.481265	0.656311	NaN	NaN	-0.675	-0.141667	0.633333	1.075	0.55
Changzhi	0.583863	-0.108484	0.119137	0.119137	0.138105	0.365726	-0.0705472	0.100169	0.498505	0.802	0.166558	0.0622317	0.289853	-0.0420946	-0.241263	-0.620632	0.109653	-0.630116	-0.364558	-0.203326	-0.525789	NaN	NaN	-0.681144	-0.233023	1.21475	0.163392	0.335746
Anyang	0.367856	0.560714	-0.262078	0.601831	0.14288	-0.0371014	0.466846	0.61083	0.196874	-0.0281023	-0.379065	0.637828	0.106883	-0.190085	0.430849	0.655826	0.529839	0.151879	0.475845	-0.136091	0.187875	-0.213406	0.0110106	-0.678274	-0.00643452	1.49811	-0.195685	0.286904
Linyi	-0.279861	-0.274029	1.01775	-0.0760475	-0.273067	-0.184748	-0.137191	-0.110016	0.148147	-0.198335	-0.69428	0.426691	0.216085	0.331579	0.841111	0.650886	0.385929	0.209291	0.46066	0.71203	-0.0284911	0.0918757	0.120809	0.250496	-0.0604737	1.12386	-0.801509	0.541617
Shangqiu	0.0811948	0.0592971	0.0304005	0.161015	-0.00588125	0.255347	0.240834	-0.0276503	0.161015	-0.238084	-0.542851	0.385961	0.19004	-0.151008	0.306141	0.596395	0.610908	-0.0494193	0.545601	0.0376568	0.0158878	NaN	NaN	-0.838651	-0.0822822	0.0943985	-0.449515	0.736144
Heze	0.302118	0.651534	0.293379	0.144815	-0.807741	-0.204747	0.136076	-0.309615	-0.484396	-0.161052	-0.606743	0.406986	-0.0299659	0.214727	0.940068	0.634202	0.494377	0.37203	0.511855	0.730331	0.37203	NaN	NaN	-0.361896	0.0938924	0.428137	-0.604983	0.952294
Tai'an	0.39111	0.295171	1.47841	0.279181	-0.648225	-0.192517	-0.176527	-0.192517	-0.560281	-0.0486089	-0.65622	0.487048	0.215222	0.495043	1.13463	0.942757	0.543012	0.191238	0.559002	0.73489	0.191238	NaN	NaN	0.144901	0.196239	0.664792	-0.675679	1.24824
Weifang	0.418446	0.511469	1.15572	0.202073	-0.198618	-0.791641	-0.0703969	-0.294784	-0.471088	-0.39095	-0.62335	0.514612	0.242142	0.522626	1.05154	0.803109	0.59475	0.402418	0.602764	0.730985	-0.254715	0.918752	0.333028	0.865734	0.241046	0.449275	-0.725137	1.29052
Winter
Site	1742	1751	1774	1776	1794	1797	1798	1799	1800	1822	1823	1830	1858	1867	1872	1882	1883	1886	1889	1890	1910	1914	1937	1956	1958	1961	1963	1964
Yan'an	1.88506	-0.506047	0.125876	0.54808	0.125876	-0.249416	-0.319783	-0.366695	-0.0383139	1.0172	0.0320533	-0.202504	-0.765442	0.501168	-0.437062	0.196244	0.0555091	-0.249416	0.782638	-0.0852255	-0.0617697	NaN	NaN	0.273345	1.37691	-0.0662139	0.867572	-0.320883
Xi'an	0.819684	-0.310425	0.41531	0.961215	1.08253	-0.191252	0.577059	-0.454095	-0.191252	0.41531	-0.555188	0.314216	-0.797813	0.273779	-0.555188	0.496185	-1	0.577059	0.354654	0.738809	0.0311542	-0.350144	-0.843143	-0.067993	0.894078	-0.11309	1.19473	-0.308511
Yuncheng	-0.0759461	-1	1.24853	0.786504	0.139666	0.293675	0.817306	0.0164593	0.786504	0.0472611	0.786504	-0.168351	-0.353162	0.0472611	-0.815189	0.293675	0.0164593	0.0780629	-0.414766	-0.106748	0.139666	NaN	NaN	-0.163642	1.46369	-0.384078	1.52852	-0.747148
Luoyang	0.649013	-0.146643	0.978816	-0.264286	0.34458	0.217733	-0.264286	-0.11207	0.0401469	0.496797	-0.213547	0.166994	-0.746306	-0.340395	0.217733	0.36995	0.0147775	0.34458	-0.264286	0.0401469	-0.594089	NaN	NaN	-0.000481078	0.324086	-0.350866	0.331462	-0.332425
Zhengzhou	0.410457	-0.27417	0.315156	0.353277	0.124554	0.0292527	0.0101925	0.60106	-0.142289	0.0101925	0.334216	-0.21853	-0.809398	-0.0469882	0.467638	0.257976	-0.0660485	0.315156	0.0101925	0.296096	0.219855	NaN	-0.835208	0.171875	-0.21875	-0.316406	0.985677	0.0742188
Taiyuan	-0.177179	-0.373134	0.708936	0.329172	0.677289	0.45576	0.582348	0.0443497	0.107644	-0.0505912	0.803877	0.835524	-0.303767	0.677289	-0.177179	0.424113	-0.810118	0.424113	-0.493649	0.107644	-0.0822382	-0.334896	-0.821523	0.0810811	0.261261	1.07207	1.07207	-0.279279
Shijiazhuang	1.50973	-0.268876	0.844499	-0.0323938	0.300221	0.451409	-0.60691	-0.697623	-0.123107	0.330458	-0.183582	-0.123107	-0.304533	1.20735	-0.60691	0.0280815	-0.21382	-0.334771	-0.0323938	0.360696	0.239745	-0.116066	0.15545	-0.0494297	0.267427	0.774398	0.711027	-0.493029
Cangzhou	0.254096	-0.273412	0.504915	0.504915	1.07822	0.504915	-0.534193	-0.785012	-0.534193	0.504915	-0.0325544	-0.319205	-0.426699	0.146602	-0.534193	0.218265	-0.247542	-0.390868	0.146602	0.612409	0.719903	0.368477	-1	0.374012	1.30609	1.14539	0.598996	0.0526057
Jinan	0.783442	-0.475673	0.783442	0.254289	-0.274864	-0.255266	-0.960803	-0.706026	-0.274864	0.450272	0.01911	0.509067	-0.157274	0.705049	0.58746	1.35179	-0.43165	0.607058	1.07742	1.03822	0.215093	-0.475673	-0.358718	-0.0433031	0.0574018	0.258812	0.460222	-0.345418
Linfen	-0.128417	-0.0546627	0.830324	0.394532	0.394532	0.0749519	1.17896	-0.128417	-0.0122063	-0.0122063	0.510743	-0.215576	-0.389892	0.249268	-0.418945	0.0168464	0.0168464	-0.0703119	-0.302734	-0.0122063	0.104005	NaN	NaN	0.508296	1.11161	-0.321267	0.960784	-0.698341
Changzhi	-0.62487	0.0985959	0.634496	0.286161	0.822061	0.232571	0.714881	-0.142559	-0.0889693	-0.0889693	0.848857	-0.276534	-0.196149	0.929242	1.06322	0.768471	-0.0353792	0.286161	0.152186	0.580906	-0.0889693	NaN	NaN	0.351351	-0.211712	-0.493243	0.745495	-0.54955
Anyang	2.08425	0.134219	1.32773	0.0765769	1.03677	-0.38897	0.891284	-0.359873	0.454834	1.00767	-0.272583	-0.0689065	-0.82542	-0.243487	0.39664	0.57122	0.0765769	0.542124	-0.0107131	-0.592647	-0.0107131	-0.428357	-0.265267	-0.0644491	-0.168399	-0.220374	0.871102	0.0914761
Linyi	1.10522	-0.51411	1.16263	0.416239	-0.387573	0.0334714	0.0334714	0.014333	-0.196189	0.28227	0.148302	0.377962	0.0334714	0.588484	0.875559	0.799006	-0.444988	-0.157912	0.645899	0.243993	0.416239	-0.269211	-0.249846	0.594937	0.367089	-0.316456	1.27848	-0.443038
Shangqiu	1.08916	-0.260809	0.475827	-0.175837	0.284161	-0.195004	0.111662	0.590826	0.111662	0.437494	0.303328	-0.118337	-0.348336	-0.00333777	0.475827	0.322494	0.0349954	0.0158288	0.169161	0.590826	-0.0416709	NaN	NaN	0.718405	0.27373	-0.477444	0.655598	-0.294047
Heze	1.27867	-0.198336	1.37668	0.445609	-0.0689296	-0.411956	-0.754981	-0.754981	-0.33845	0.249595	0.176089	0.127085	0.0290778	0.127085	1.03365	0.151587	-0.289446	0.690628	-0.166937	0.151587	0.127085	NaN	NaN	0.202624	0.348397	-0.234694	0.96793	-0.30758
Tai'an	0.476793	-0.121907	0.836013	0.37701	-0.241647	-0.52104	-0.800433	-0.94013	-0.46117	0.117573	-0.141863	-0.620823	-0.181777	-0.00216672	0.476793	1.3948	-0.421257	0.43688	0.756187	0.37701	-0.241647	NaN	NaN	-0.318221	0.454751	-0.630884	-0.587459	0.598055
Weifang	0.5603	0.100305	1.02417	0.0120866	0.0542569	-0.768063	-0.451786	-0.683723	-0.388531	0.328364	0.665726	0.876577	-0.21985	0.391619	0.454874	1.00309	-0.388531	0.370534	0.328364	0.750066	0.349449	-0.693669	0.416275	0.755527	0.527958	-0.0247074	0.918075	-0.414824

## Sheet: Frequency per decade
The frequency of extreme drought and flood in North China for each decade from 1740s to 1990s.
Decade	Extreme drought	Extreme flood	Extreme drought and flood
1740s	1	1	2
1750s	0	1	1
1760s	0	0	0
1770s	2	2	4
1780s	2	0	2
1790s	1	4	5
1800s	1	1	2
1810s	1	0	1
1820s	0	2	2
1830s	0	1	1
1840s	1	0	1
1850s	1	1	2
1860s	1	1	2
1870s	2	1	3
1880s	0	4	4
1890s	0	1	1
1900s	3	0	3
1910s	2	2	4
1920s	3	0	3
1930s	2	1	3
1940s	1	0	1
1950s	0	2	2
1960s	1	3	4
1970s	0	0	0
1980s	2	0	2
1990s	2	0	2
